# Supplementary material for: Bioactivity-guided isolation of neuritogenic triterpenoids from the leaves of Ilex latifolia Thunb
Source: Royal Society of Chemistry journal article supplement (doi:10.1039/c7fo00981j), 2017-01-01
Supplement: c7fo00981j1.pdf [file c7fo00981j1.pdf]

## Supplementary

### Bioactivity-guided isolation of neuritogenic triterpenoids from the leaves of *Ilex latifolia* Thunb

Xueli Cao,<sup>a</sup> Yu Liu,<sup>b</sup> Jing Li,<sup>a</sup> Lan Xiang,<sup>a</sup> Hiroyuki Osada,<sup>c</sup> and Jianhua Qi<sup>a,\*</sup>

<sup>a</sup> College of Pharmaceutical Sciences, Zhejiang University, Hangzhou 310058, China. E-mail: qijianhua@zju.edu.cn; Tel./Fax: +86-0571-88208627

<sup>b</sup> State Key Laboratory of Plant Physiology and Biochemistry, College of Life Sciences, Zhejiang University, Hangzhou 310058, China

<sup>c</sup> Chemical Biology Research Group, RIKEN Center for Sustainable Resource Science, Wako-shi, Saitama 351-0198, Japan

The original NMR spectra of compounds 1-7 are listed as **Figures S1-S12**:

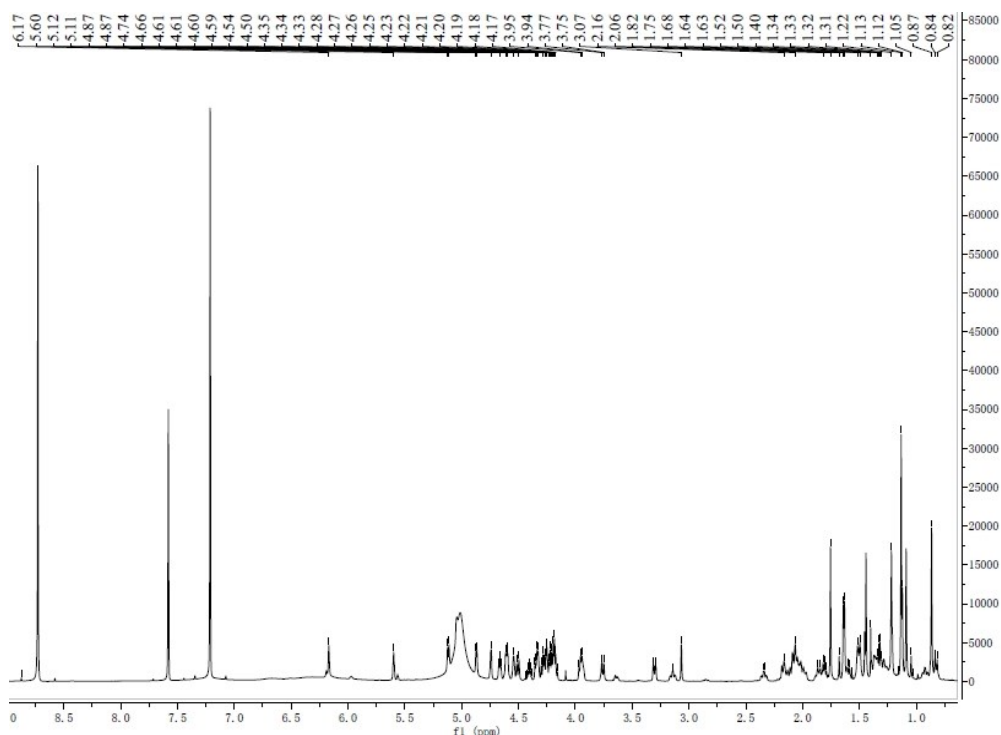

**Fig.S1** <sup>1</sup>H NMR spectrum (600 MHz, pyridine-*d*<sub>5</sub>) of compound 1

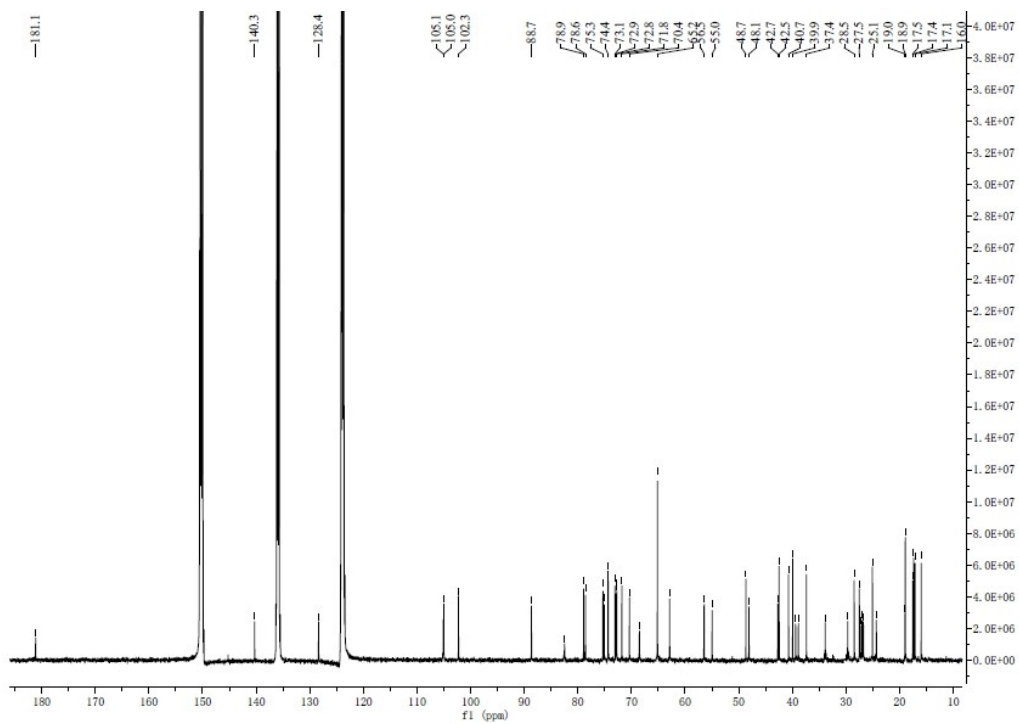

**Fig.S2**  $^{13}\text{C}$  NMR spectrum (150 MHz, pyridine- $d_5$ ) of compound **1**

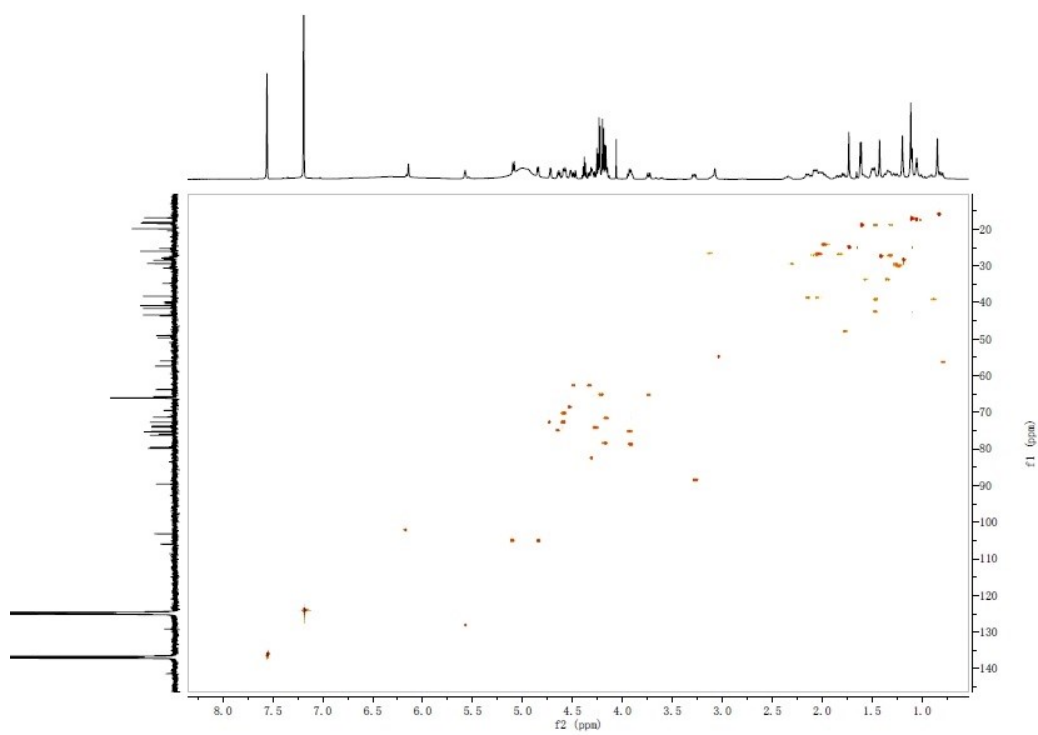

**Fig.S3** HSQC spectrum of compound **1**

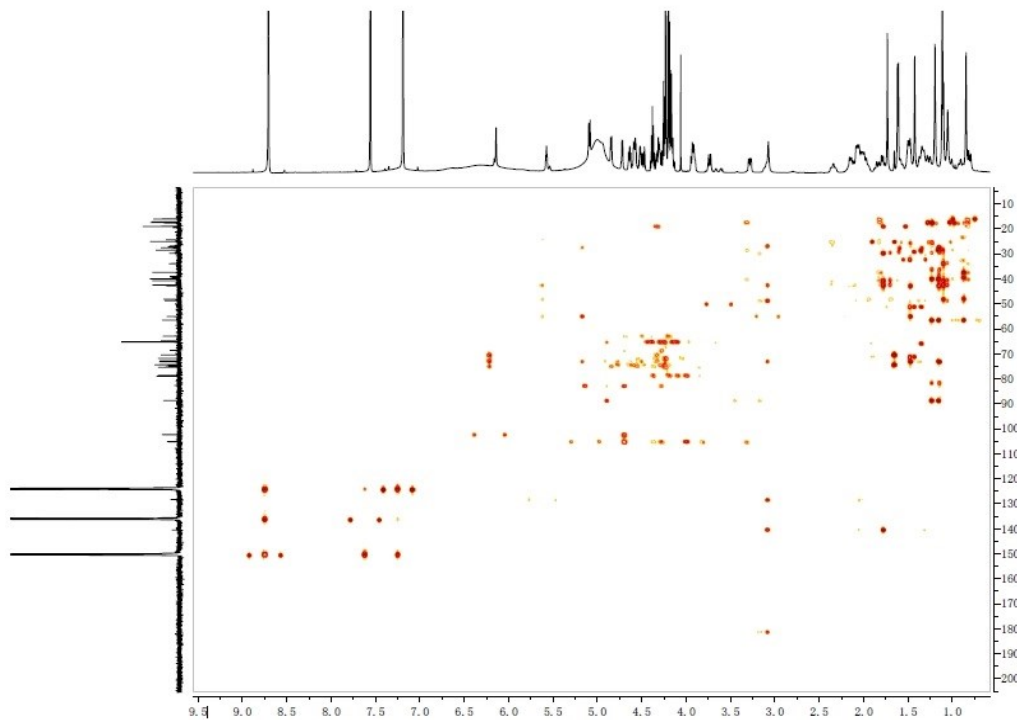

**Fig.S4** HMBC spectrum of compound **1**

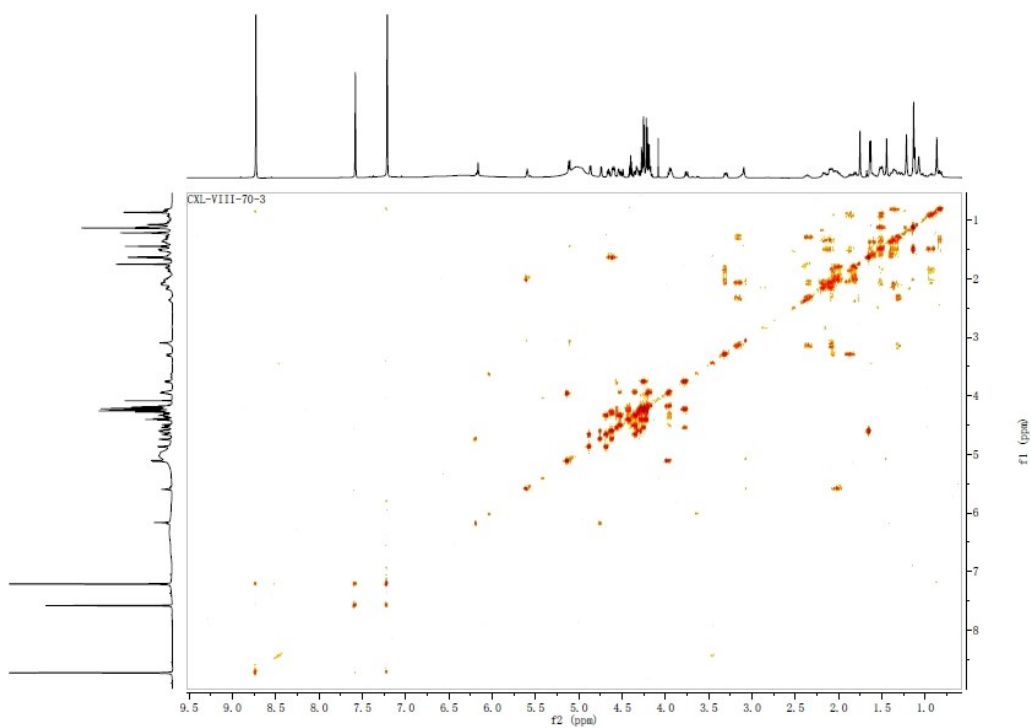

**Fig.S5**  $^1\text{H}$ - $^1\text{H}$  COSY spectrum of compound **1**

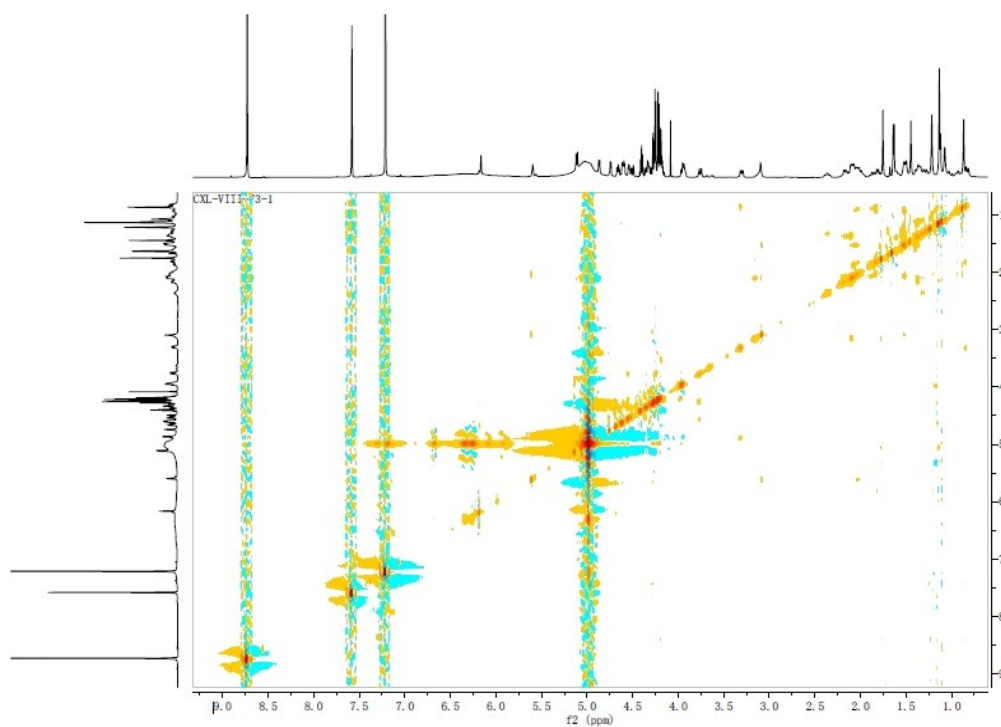

Fig.S6 NOESY spectrum of compound 1

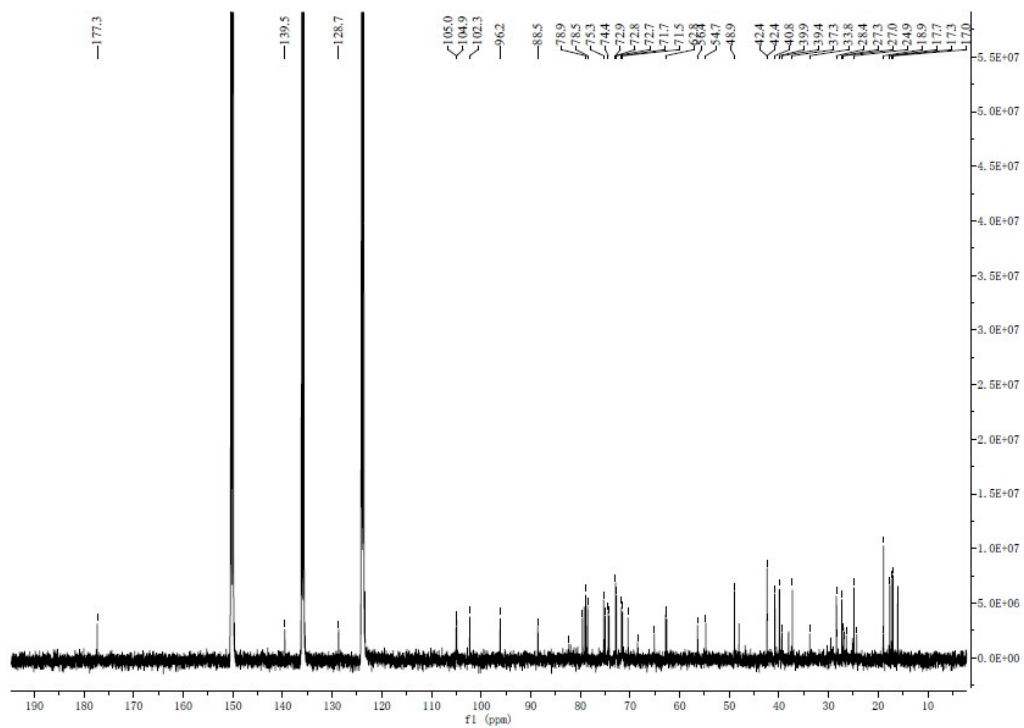

Fig.S7  $^{13}\text{C}$  NMR spectrum (125 MHz, pyridine- $d_5$ ) of compound 2

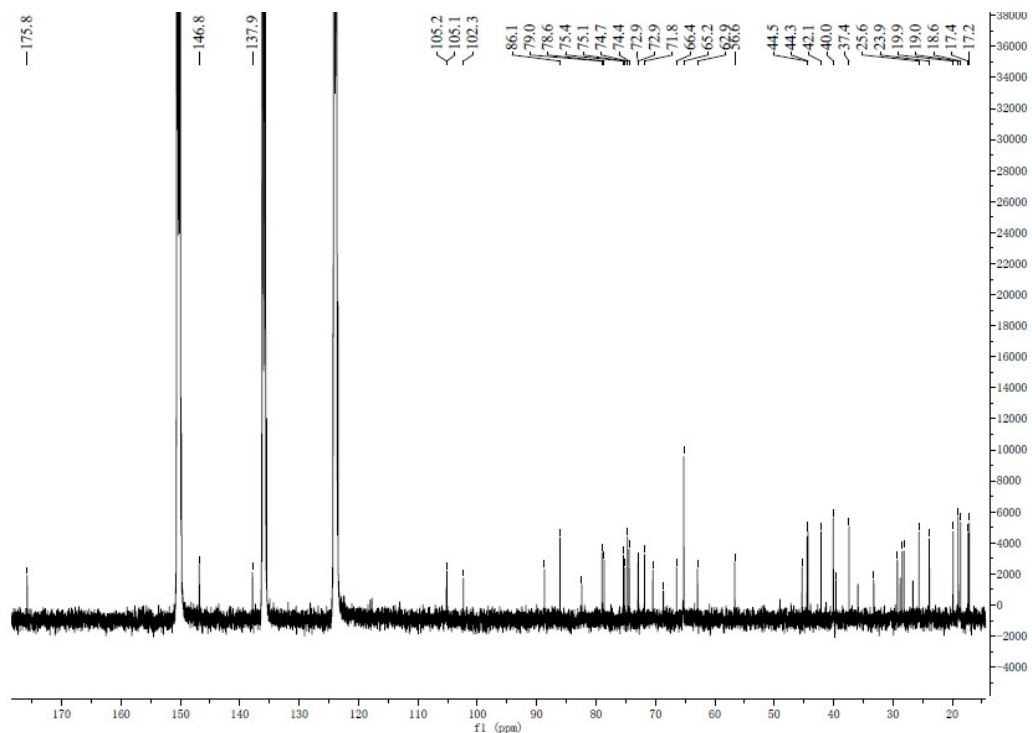

Fig.S8  $^{13}\text{C}$  NMR spectrum (125 MHz, pyridine- $d_5$ ) of compound 3

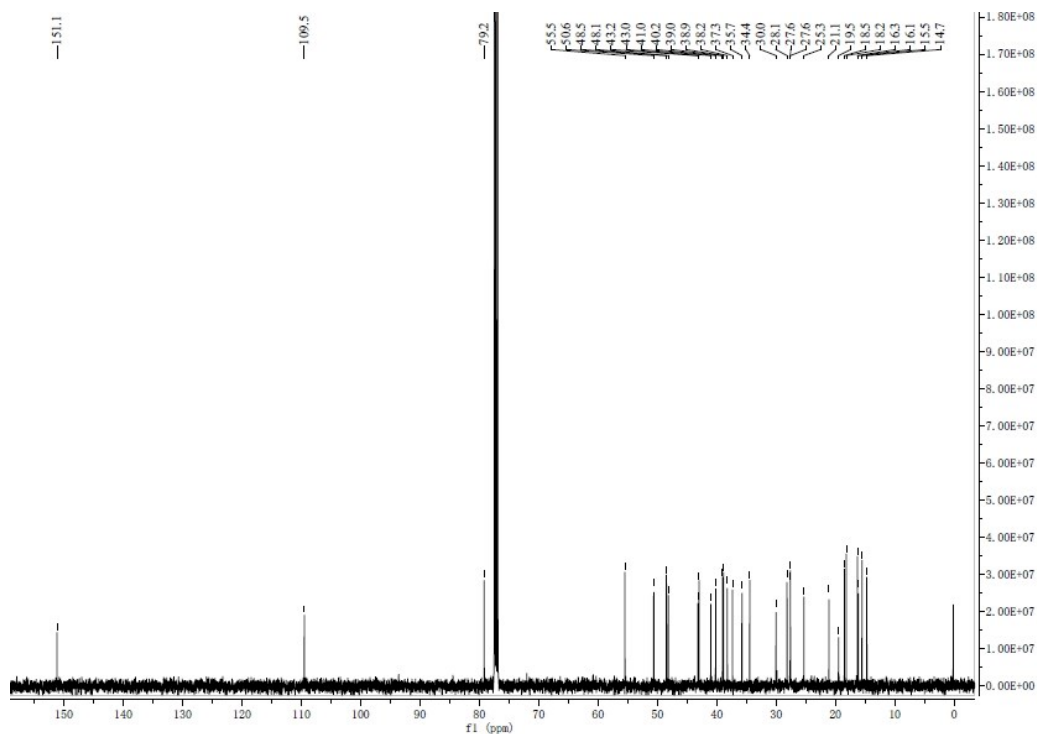

Fig.S9  $^{13}\text{C}$  spectrum (125 MHz,  $\text{CDCl}_3$ ) of compound 4

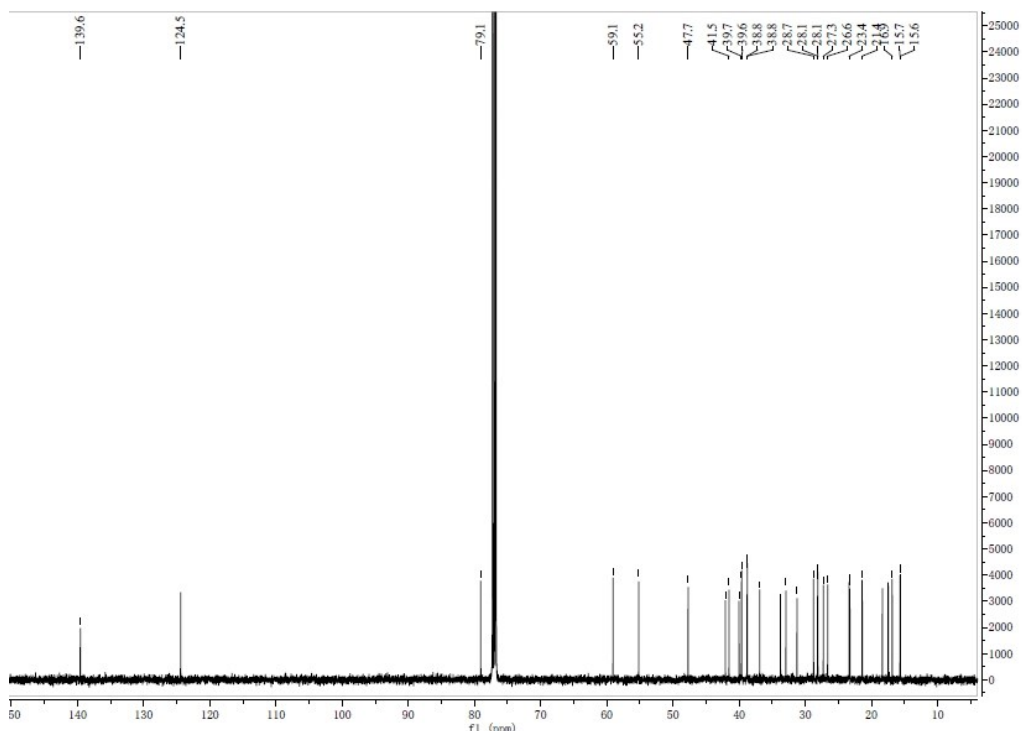

Fig.S10 <sup>13</sup>C NMR spectrum (125 MHz, CDCl<sub>3</sub>) of compound 5

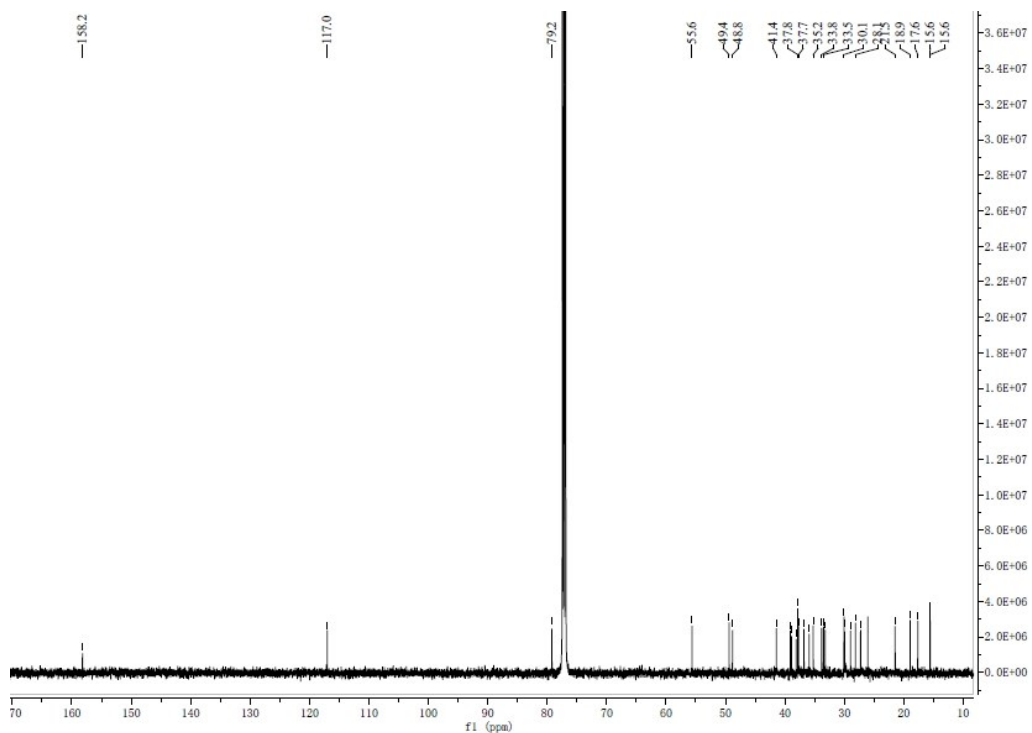

Fig.S11 <sup>13</sup>C NMR spectrum (125 MHz, CDCl<sub>3</sub>) of compound 6

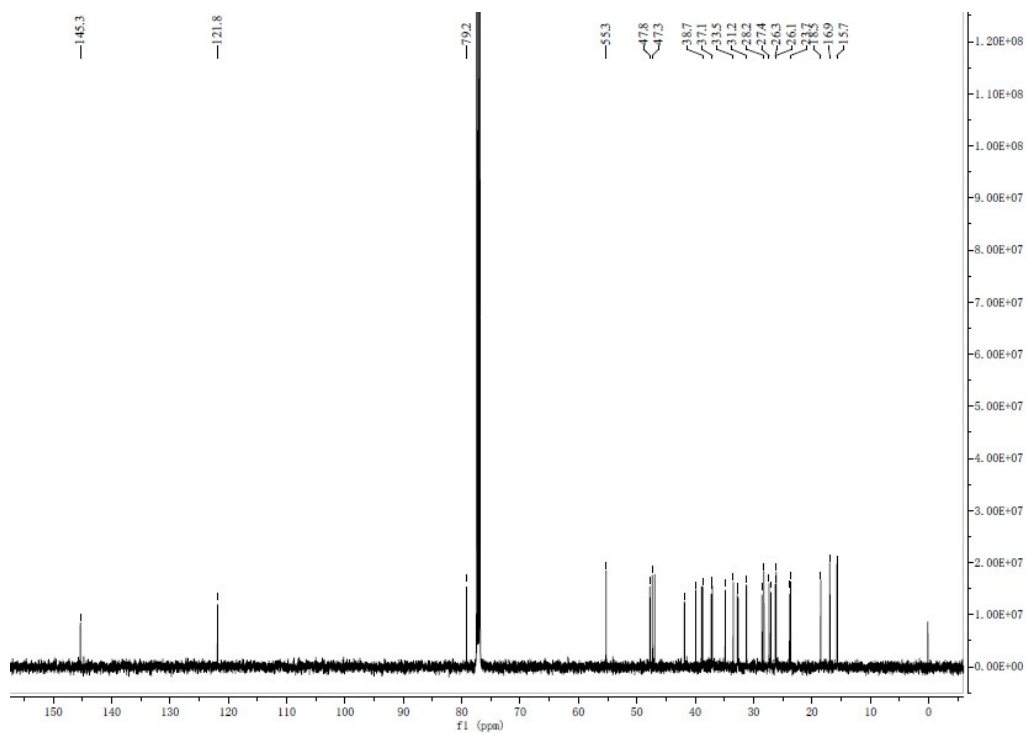

Fig.S12  $^{13}\text{C}$  NMR spectrum (125 MHz,  $\text{CDCl}_3$ ) of compound 7
